# Supplementary material for: A N, S dual doping strategy via electrospinning to prepare hierarchically porous carbon polyhedra embedded carbon nanofibers for flexible supercapacitors
Source: Royal Society of Chemistry journal article supplement (doi:10.1039/c8ta12246f), 2019-01-01
Supplement: c8ta12246f1.pdf [file c8ta12246f1.pdf]

## Electronic Supplementary Information

### **N, S dual doping strategy via electrospinning to prepare hierarchically porous carbon polyhedra embedded carbon nanofibers for flexible supercapacitors**

Yanjiang Li<sup>a</sup>, Guang Zhu<sup>b</sup>, Hailong Huang<sup>a\*</sup>, Min Xu<sup>a</sup>, Ting Lu<sup>a</sup> and Likun Pan<sup>a\*</sup>

<sup>a</sup>Shanghai Key Laboratory of Magnetic Resonance, School of Physics and Materials Science, East

China Normal University, Shanghai 200062, P. R. China

<sup>b</sup>Key Laboratory of Spin Electron and Nanomaterials of Anhui Higher Education Institutes, Suzhou Un

iversity, Suzhou 234000, P. R. China

\* Corresponding author. Tel: +86 21 62234132; Fax: +86 21 62234321. E-mail:

[lkpan@phy.ecnu.edu.cn](mailto:lkpan@phy.ecnu.edu.cn) (Likun Pan); [huanghao3310774@163.com](mailto:huanghao3310774@163.com) (Hailong Huang)

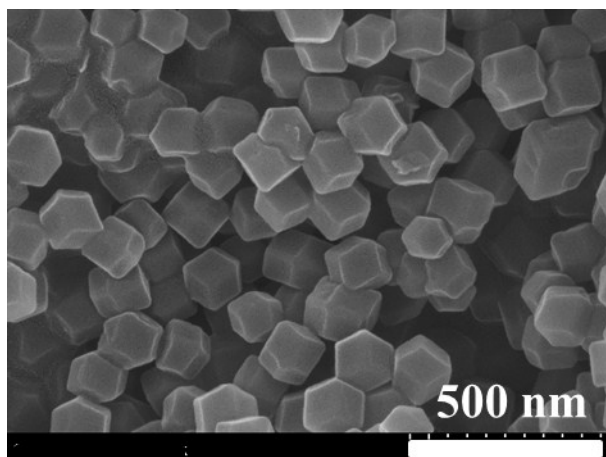

**Fig. S1** FESEM image of ZIF-67.

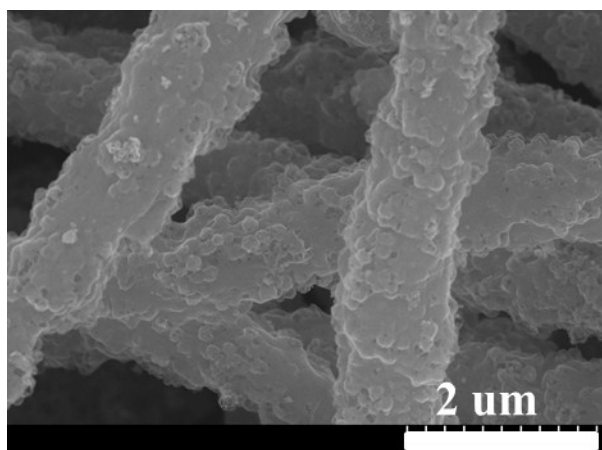

**Fig. S2** FESEM image of CPCNF precursor after electrospinning.

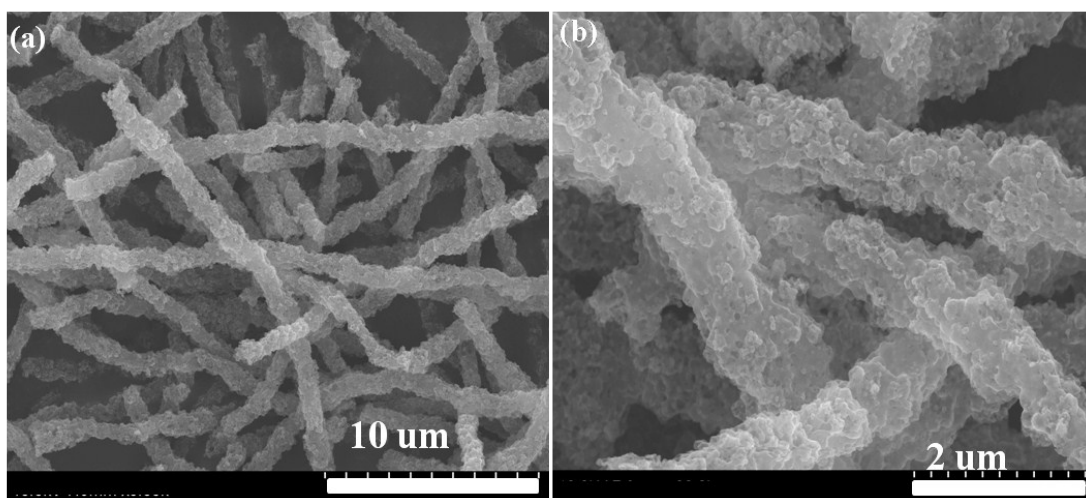

**Fig. S3** FESEM images of Co-CPCNF at (a) low- and (b) high-magnification.

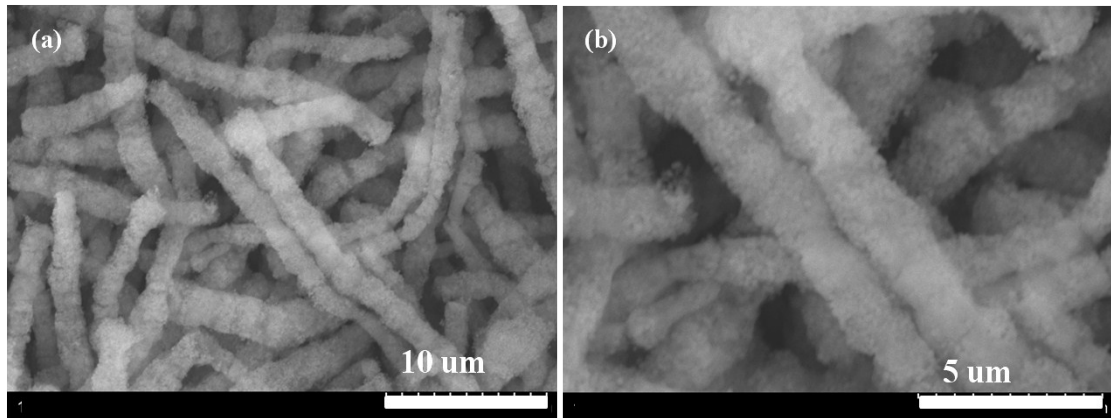

Fig. S4 FESEM images of NSCPCNF precursor after electrospinning at (a) low- and (b) high-magnification.

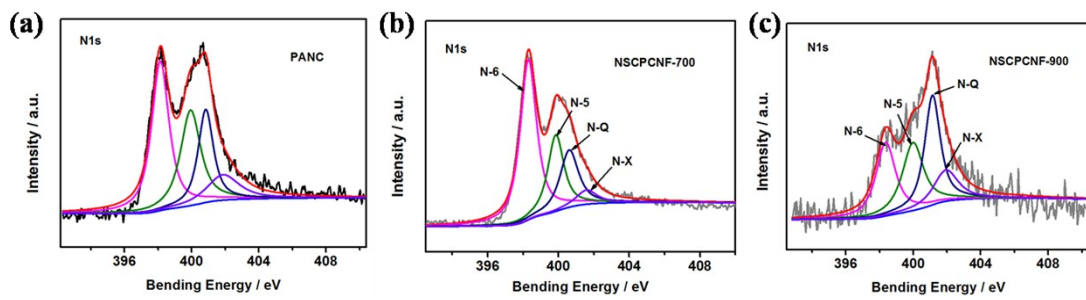

Fig. S5 High resolution N1s spectra of PANC (a), NSCPCNF-700 (b) and NSCPCNF-900 (c).

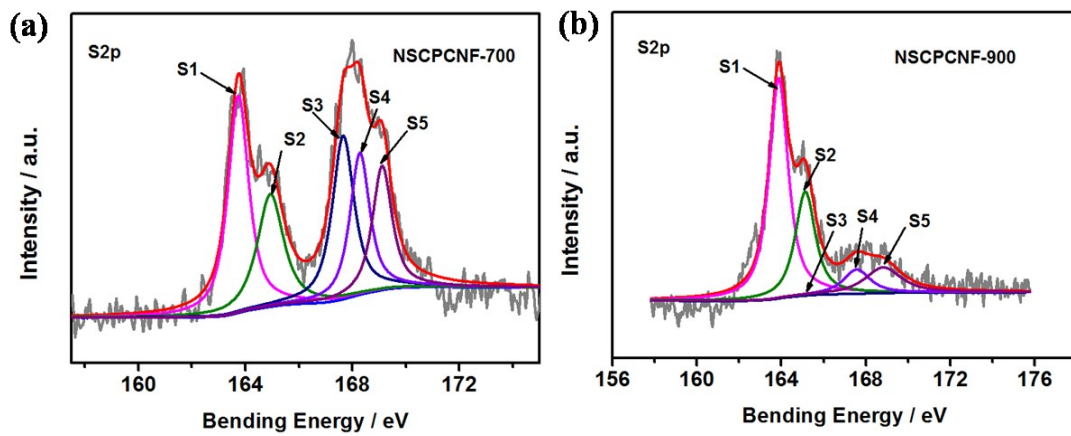

Fig. S6 High resolution S2p spectra of NSCPCNF-700 (a) and NSCPCNF-900 (b).

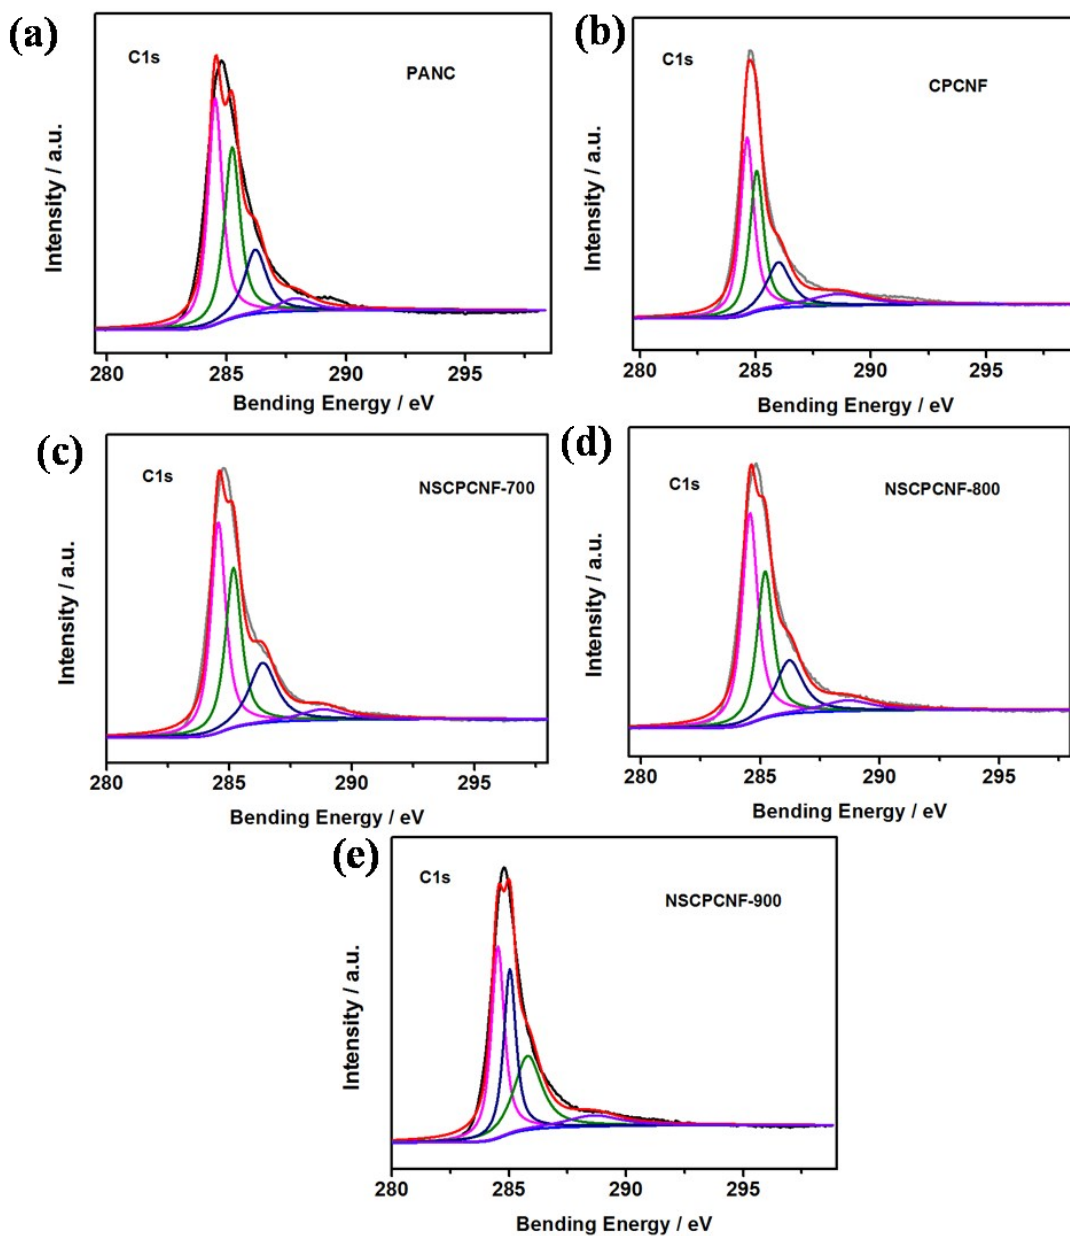

**Fig. S7** High resolution C1s spectra of PANC (a), CPCNF (b), NSCPCNF-700 (c), NSCPCNF-800 (d),

NSCPCNF-900 (e).

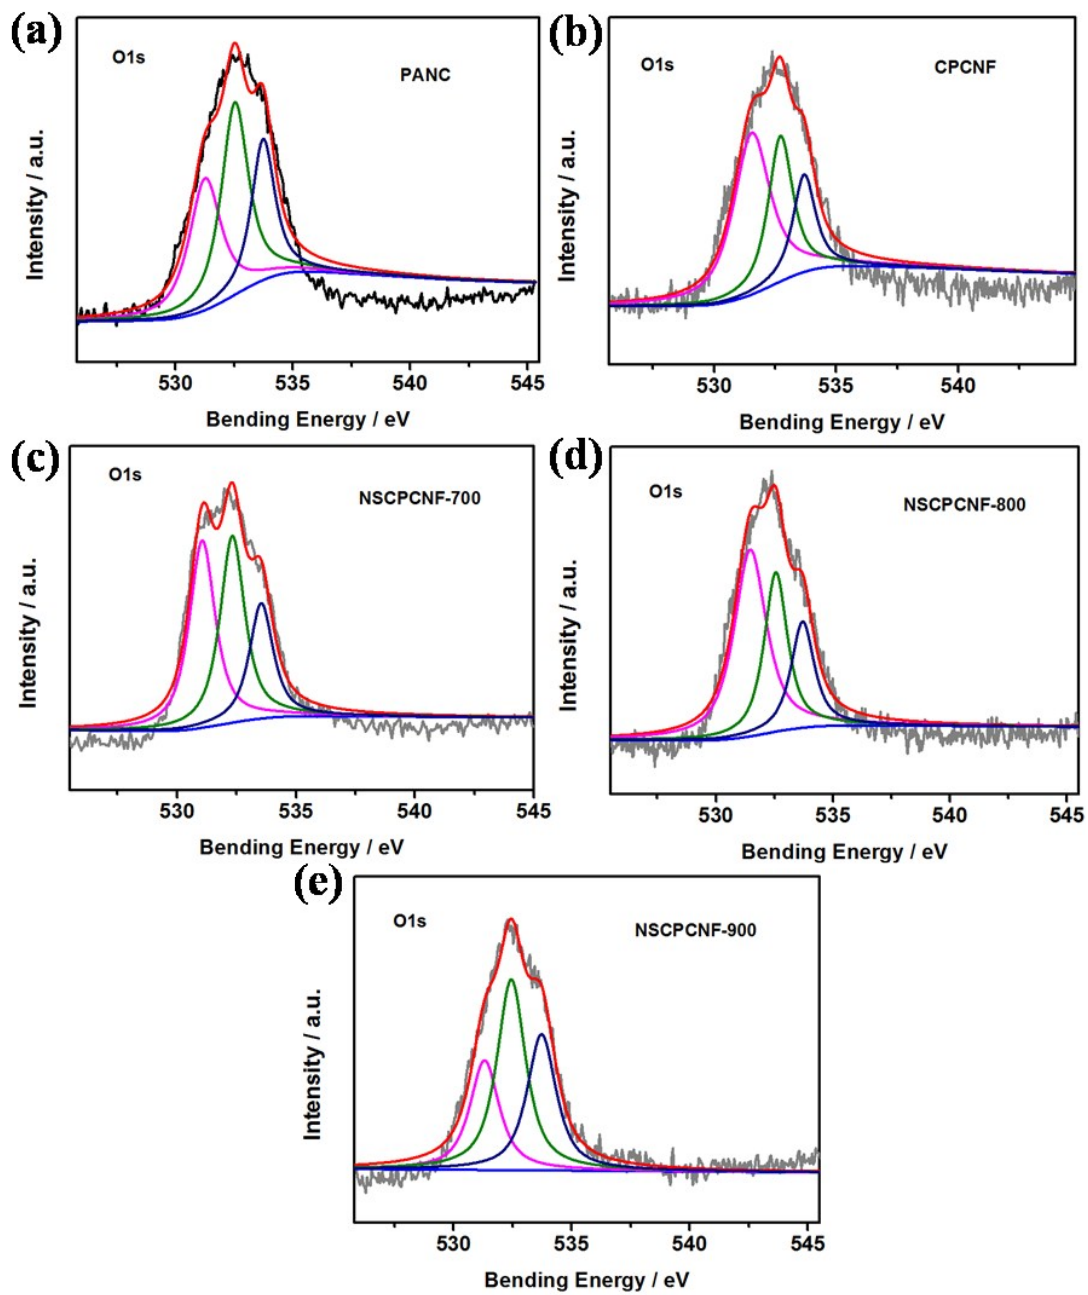

**Fig. S8** High resolution O1s spectra of PANC (a), CPCNF (b), NSCPCNF-700 (c), NSCPCNF-800 (d),

NSCPCNF-900 (e).

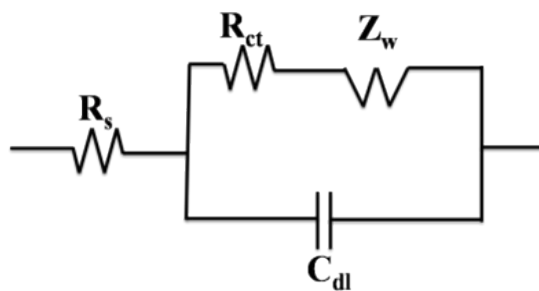

Fig. S9 Equivalent circuit model for Nyquist plots of PANC, CPCNF and NSPCNF.

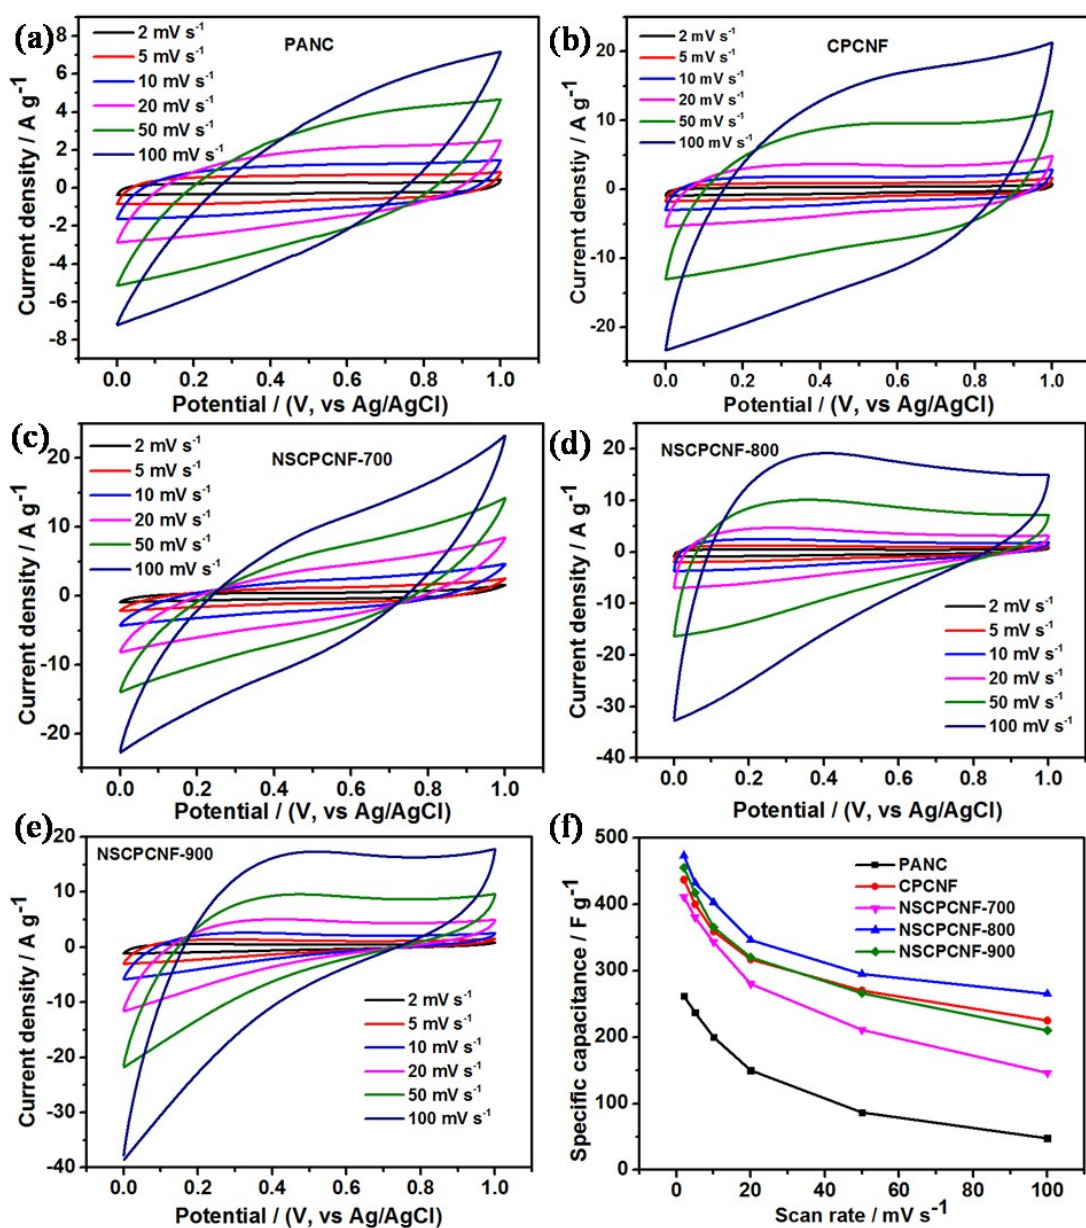

Fig. S10 CV curves of PANC (a), CPCNF (b), NSPCNF-700 (c), NSPCNF-800 (d), NSPCNF-900 (e).

Specific capacitances of PANC, CPCNF and NSCPCNF at different scan rates (f).

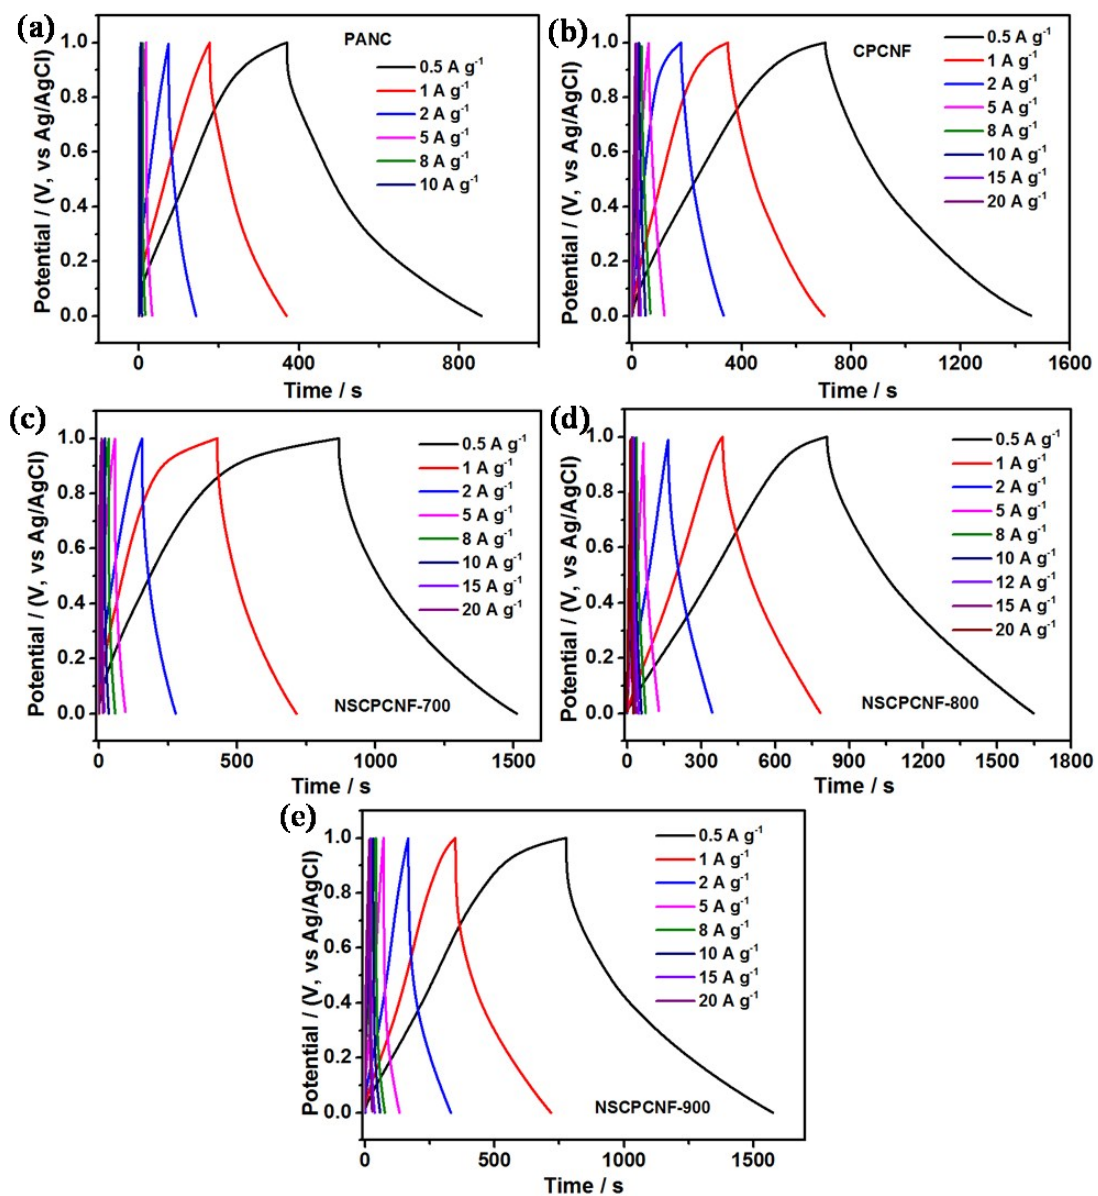

Fig. S11 GCD curves of PANC (a), CPCNF (b), NSCPCNF-700 (c), NSCPCNF-800 (d), NSCPCNF-900 (e) at

different current densities.

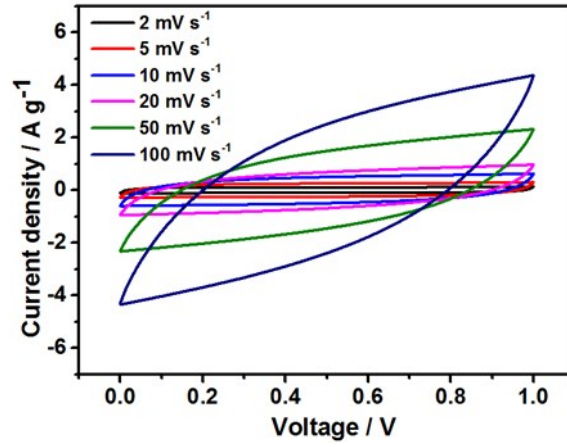

Fig. S12 CV curves of CPCNF//CPCNF at different scan rates.

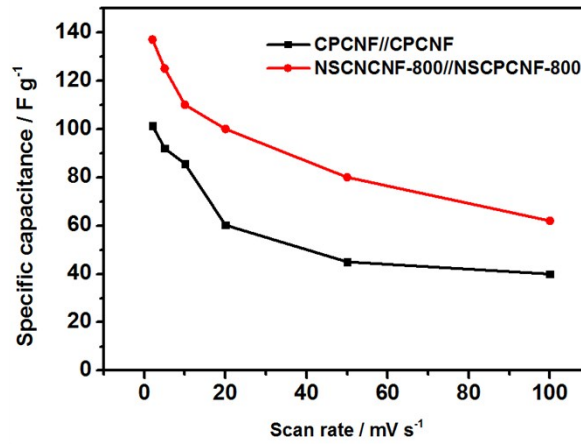

Fig. S13 Specific capacitances of CPCNF//CPCNF and NSCPCNF-800//NSCPCNF-800 at different scan rates.

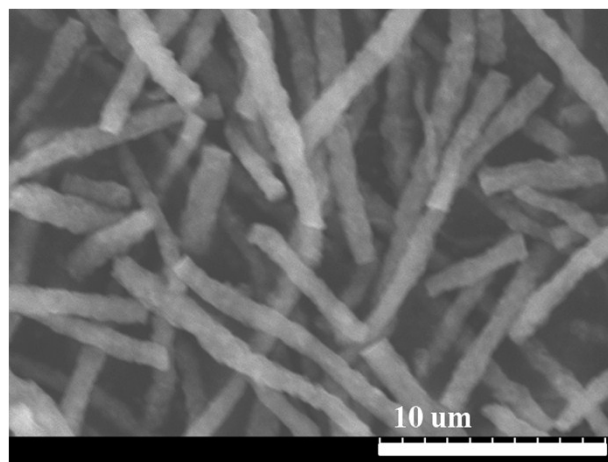

Fig. S14 FESEM image of NSCPCNF-800 after 3000 charge-discharge cycles.



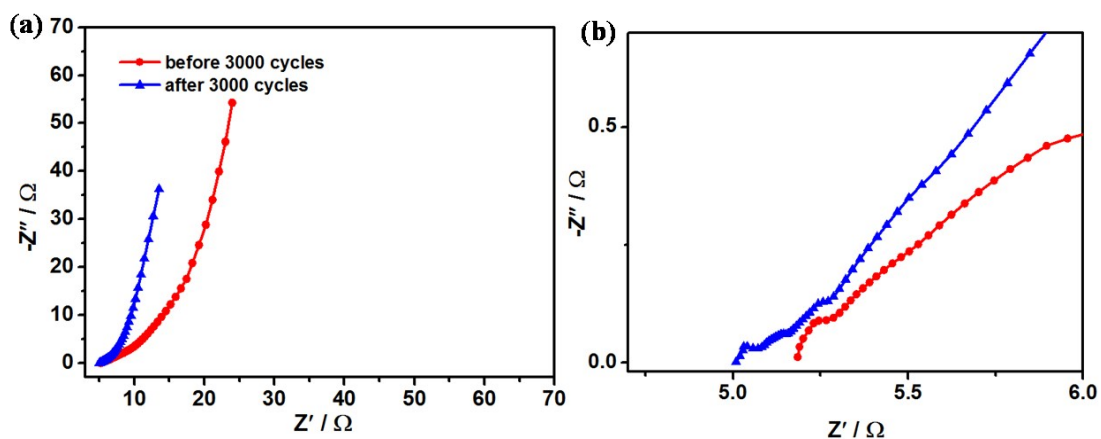

Fig. S15 Nyquist plots (a) and magnified plots in high frequency region (b) of NSCPCNF-800//NSCPCNF-800

before and after 3000 charge-discharge cycles.

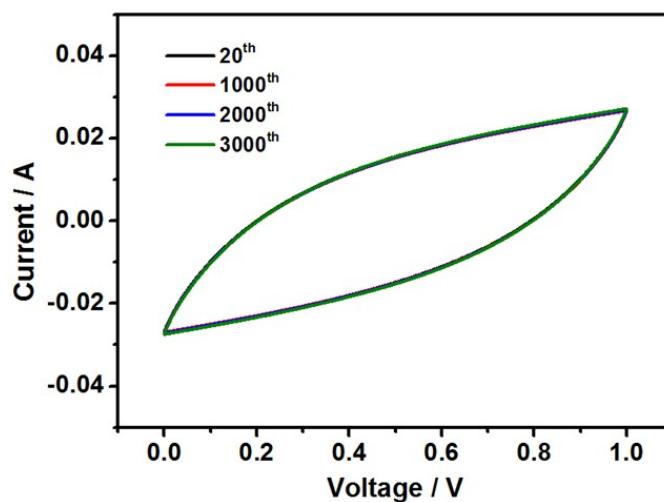

Fig. S16 CV curves of CPCNF//CPCNF in the 20<sup>th</sup>, 1000<sup>th</sup>, 2000<sup>th</sup> and 3000<sup>th</sup> cycles.

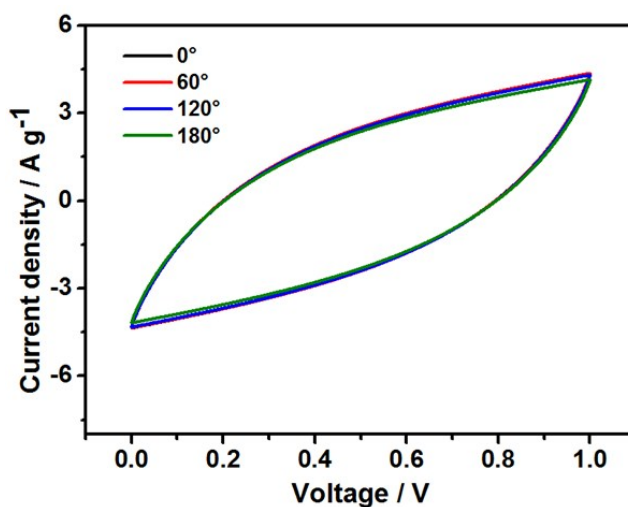

Fig. S17 CV curves of CPCNF//CPCNF at 0°, 60°, 120° and 180° bending angles.

**Table S1** Comparison of electrochemical performances of CPCNF and NSCPCNF-800 with the ECNFs

reported in the literatures for supercapacitors.

| Electrode material                            | Current density /<br>A g <sup>-1</sup> | Electrolyte                                           | Specific capacitance / F<br>g <sup>-1</sup> | Ref. |
|-----------------------------------------------|----------------------------------------|-------------------------------------------------------|---------------------------------------------|------|
| Hollow particle-based N-doped ECNFs           | 1                                      | 1 mol L <sup>-1</sup> H <sub>2</sub> SO <sub>4</sub>  | 307.2                                       | 1    |
| N-doped graphitic hierarchically porous ECNFs | 0.5                                    | 6 mol L <sup>-1</sup> KOH                             | 326                                         | 2    |
| N rich hierarchically porous ECNFs            | 0.5                                    | 6 mol L <sup>-1</sup> KOH                             | 302                                         | 3    |
| 1D hollow ECNFs                               | 1                                      | 1 mol L <sup>-1</sup> H <sub>2</sub> SO <sub>4</sub>  | 332                                         | 4    |
| Micro-/mesoporous ECNFs                       | 1                                      | 1 mol L <sup>-1</sup> H <sub>2</sub> SO <sub>4</sub>  | 272                                         | 5    |
| Mutichannel ECNFs                             | 0.5                                    | 6 mol L <sup>-1</sup> KOH                             | 270                                         | 6    |
| N rich ECNFs/graphene                         | 0.1                                    | 6 mol L <sup>-1</sup> KOH                             | 381                                         | 7    |
| N-enriched mesoporous ECNFs                   | 0.2                                    | 2 mol L <sup>-1</sup> Li <sub>2</sub> SO <sub>4</sub> | 220                                         | 8    |
| Microporous CNFs                              | 0.2                                    | 6 mol L <sup>-1</sup> KOH                             | ~ 220                                       | 9    |
| Porous ECNFs paper                            | 0.2                                    | 6 mol L <sup>-1</sup> KOH                             | ~ 310                                       | 10   |
| ECNFs paper                                   | 0.05                                   | 1 mol L <sup>-1</sup> H <sub>2</sub> SO <sub>4</sub>  | ~235                                        | 11   |
| Alkali lignin added ECNFs                     | 0.4                                    | 6 mol L <sup>-1</sup> KOH                             | 64                                          | 12   |
| N, O-doped ECNFs                              | 0.2                                    | 6 mol L <sup>-1</sup> KOH                             | 233.1                                       | 13   |

|               |     |                                                      |       |      |
|---------------|-----|------------------------------------------------------|-------|------|
| N-doped ECNFs | 0.5 | 1 mol L <sup>-1</sup> H <sub>2</sub> SO <sub>4</sub> | 223.8 | 14   |
| CPCNF         | 0.5 | 1 mol L <sup>-1</sup> H <sub>2</sub> SO <sub>4</sub> | 379   |      |
|               | 1   |                                                      | 352   | This |
| NSCPCNF-800   | 0.5 | 1 mol L <sup>-1</sup> H <sub>2</sub> SO <sub>4</sub> | 421   | work |
|               | 1   |                                                      | 396   |      |

**Table S2** Specific capacitance retentions of NSCPCNF-800//NSCPCNF-800 and CPCNF//CPCNF at different

bending angles.

| Bending angle                  |                          | 0°   | 60°   | 120°  | 180°  |
|--------------------------------|--------------------------|------|-------|-------|-------|
| Specific capacitance retention | NSCPCNF-800//NSCPCNF-800 | 100% | 99.1% | 98.8% | 97.3% |
|                                | CPCNF//CPCNF             | 100% | 99.3% | 98.4% | 97.6% |

## References

- 1 L.-F. Chen, Y. Lu, L. Yu and X. W. Lou, *Energy Environ. Sci.*, 2017, **10**, 1777-1783.
- 2 Y. Yao, P. Liu, X. Li, S. Zeng, T. Lan, H. Huang, X. Zeng and J. Zou, *Dalton Trans.*, 2018, **47**, 7316-7326.
- 3 Y. Yao, H. Wu, L. Huang, X. Li, L. Yu, S. Zeng, X. Zeng, J. Yang and J. Zou, *Electrochim. Acta*, 2017, **246**, 606-614.
- 4 C. Wang, C. Liu, J. Li, X. Sun, J. Shen, W. Han and L. Wang, *Chem. Comm.*, 2017, **53**, 1751-1754.

- 5 Y. Li, W. Ou-Yang, X. Xu, M. Wang, S. Hou, T. Lu, Y. Yao and L. Pan, *Electrochim. Acta*, 2018, **271**, 591-598.
- 6 L. Zhang, L. Han, S. Liu, C. Zhang and S. Liu, *RSC Adv.*, 2015, **5**, 107313-107317.
- 7 Q. Xie, S. Zhou, A. Zheng, C. Xie, C. Yin, S. Wu, Y. Zhang and P. Zhao, *Electrochim. Acta*, 2016, **189**, 22-31.
- 8 Q. Liang, L. Ye, Q. Xu, Z.-H. Huang, F. Kang and Q.-H. Yang, *Carbon*, 2015, **94**, 342-348.
- 9 T. Le, Y. Yang, Z. Huang and F. Kang, *J. Power Sources*, 2015, **278**, 683-692.
- 10 C. Ma, Y. Li, J. Shi, Y. Song and L. Liu, *Chem. Eng. J.*, 2014, **249**, 216-225.
- 11 E. J. Ra, E. Raymundo-Piñero, Y. H. Lee and F. Béguin, *Carbon*, 2009, **47**, 2984-2992.
- 12 C. L. Lai, Z. P. Zhou, L. F. Zhang, X. X. Wang, Q. X. Zhou, Y. Zhao, Y. C. Wang, X. F. Wu, Z. T. Zhu and H. Fong, *J. Power Sources*, 2014, **247**, 134-141.
- 13 Q. Li, W. H. Xie, D. Q. Liu, Q. Wang and D. Y. He, *Electrochim. Acta*, 2016, **222**, 1445-1454.
- 14 Y. L. Cheng, L. Huang, X. Xiao, B. Yao, L. Y. Yuan, T. Q. Li, Z. M. Hu, B. Wang, J. Wan and J. Zhou, *Nano Energy*, 2015, **15**, 66-74.
